# Supplementary material for: Down-regulation of IKKβ expression in glioma-infiltrating microglia/macrophages is associated with defective inflammatory/immune gene responses in glioblastoma
Source: PubMed Central journal article supplement (PMC4741750; doi:10.18632/oncotarget.5310), 2015-09-29
Supplement: oncotarget-06-33077-s001.pdf [file oncotarget-06-33077-s001.pdf]

SUPPLEMENTARY FIGURES AND TABLES

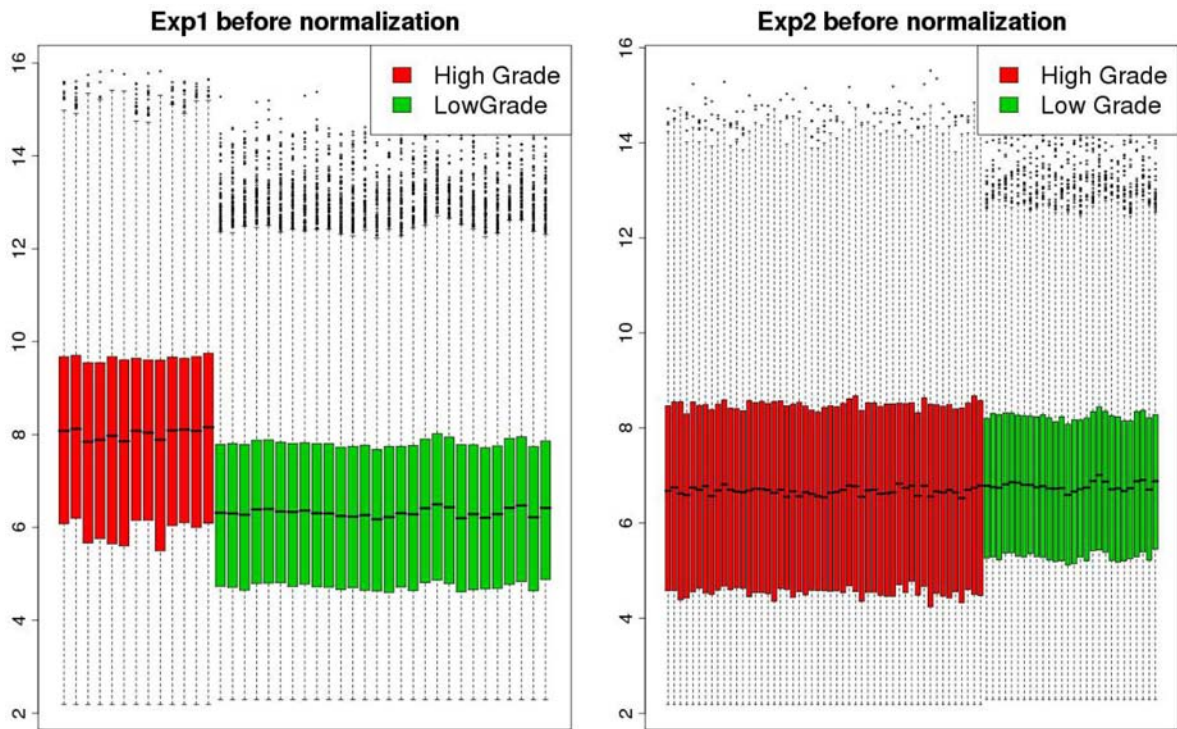

**Supplementary Figure S1: Quantile normalization.** The boxplots present overall gene expression distributions in all samples. The association between original data sets (before merging) is clearly visible.

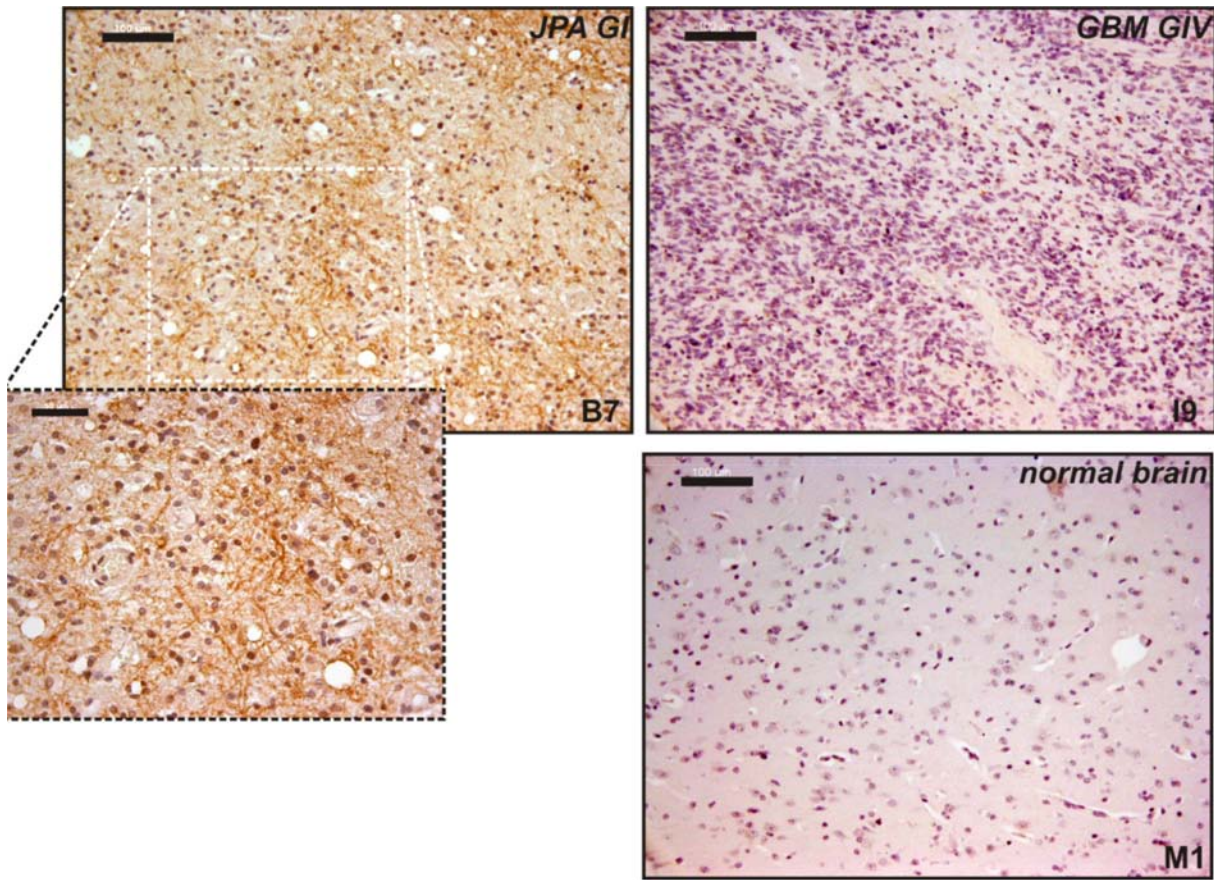

Supplementary Figure S2: Representative images of immunohistochemistry for IKK $\beta$  (brown) in JPA, GBM and normal brain.

**Supplementary Table S1: Histopathological classification of tumors enclosed in the merged dataset and used for a meta-analysis**

| Data set name | Gene profile repository | Gene profiles of low grade gliomas                                                               | Gene profiles of high grade gliomas                                                 | Reference |
|---------------|-------------------------|--------------------------------------------------------------------------------------------------|-------------------------------------------------------------------------------------|-----------|
| GSE5675       | NCBI GEO                | 41 juvenile pilocytic astrocytoma WHO grade I                                                    |                                                                                     | 31        |
| GSE2817       | NCBI GEO                | 4 oligodendroglioma WHO grade II, 6 oligoastrocytoma WHO grade II and 6 astrocytoma WHO grade II | 6 anaplastic oligoastrocytoma WHO grade III, 4 anaplastic astrocytoma WHO grade III | 32        |
| GSE8692       | NCBI GEO                | 2 mixed gliomas WHO grade II, 1 oligodendroglioma WHO grade II                                   | 6 GBM WHO grade IV, 3 gliosarcomas WHO grade IV                                     | 33        |
| GSE4271       | NCBI GEO                |                                                                                                  | 100 GBM WHO grade IV                                                                | 34        |
| E-MEXP-1507   | ArrayExpress            |                                                                                                  | 8 oligodendroglioma WHO grade III and 5 GBM grade IV                                | 35        |

**Supplementary Table S2: Gene names and expression scores in GBM and JPA**

|                 | GBM.score | JPA.score |
|-----------------|-----------|-----------|
| <i>PTPN11</i>   | -0,1641   | 0,3609    |
| <i>HFE</i>      | 0,1414    | -0,3111   |
| <i>IL6ST</i>    | -0,1408   | 0,3097    |
| <i>C7</i>       | -0,1393   | 0,3065    |
| <i>PTPRC</i>    | -0,1372   | 0,3018    |
| <i>TCF7</i>     | 0,1271    | -0,2796   |
| <i>AZGP1</i>    | -0,1231   | 0,2709    |
| <i>DUSP10</i>   | 0,1161    | -0,2555   |
| <i>ITCH</i>     | 0,1147    | -0,2523   |
| <i>CXCL10</i>   | 0,1078    | -0,2372   |
| <i>CDK1</i>     | 0,1059    | -0,233    |
| <i>P2RY14</i>   | -0,1012   | 0,2226    |
| <i>NCAM1</i>    | -0,0975   | 0,2146    |
| <i>CX3CL1</i>   | 0,0923    | -0,203    |
| <i>TLR7</i>     | -0,0911   | 0,2004    |
| <i>TLR1</i>     | -0,0748   | 0,1646    |
| <i>IL27RA</i>   | -0,06     | 0,132     |
| <i>IGF1R</i>    | -0,0581   | 0,1279    |
| <i>KCNJ10</i>   | -0,0579   | 0,1275    |
| <i>ST6GAL1</i>  | -0,0565   | 0,1242    |
| <i>PRDX2</i>    | 0,0523    | -0,1152   |
| <i>ADORA1</i>   | 0,0508    | -0,1118   |
| <i>POLR3F</i>   | -0,047    | 0,1035    |
| <i>MR1</i>      | 0,0467    | -0,1028   |
| <i>CD86</i>     | -0,0415   | 0,0913    |
| <i>MEF2A</i>    | -0,041    | 0,0901    |
| <i>PLCG1</i>    | 0,0383    | -0,0842   |
| <i>SMAD6</i>    | -0,0365   | 0,0803    |
| <i>TLR4</i>     | -0,0336   | 0,0738    |
| <i>IRAK4</i>    | 0,0331    | -0,0727   |
| <i>VCAM1</i>    | 0,0326    | -0,0718   |
| <i>MAPKAPK3</i> | 0,0309    | -0,068    |
| <i>RPS6KA3</i>  | -0,0302   | 0,0664    |
| <i>ADORA3</i>   | -0,0286   | 0,0629    |
| <i>IL1B</i>     | -0,0282   | 0,0621    |
| <i>MGLL</i>     | -0,0274   | 0,0602    |

(Continued)

|                 | GBM.score | JPA.score |
|-----------------|-----------|-----------|
| <i>NT5E</i>     | -0,0245   | 0,0539    |
| <i>FADD</i>     | 0,0227    | -0,0499   |
| <i>GNL1</i>     | 0,0223    | -0,049    |
| <i>RGS1</i>     | -0,0212   | 0,0467    |
| <i>IL1R1</i>    | -0,0209   | 0,046     |
| <i>FCGR3B</i>   | -0,0204   | 0,0449    |
| <i>MAPK9</i>    | -0,019    | 0,0419    |
| <i>IL1RAPL1</i> | -0,0186   | 0,041     |
| <i>LAT2</i>     | 0,0183    | -0,0403   |
| <i>PLEKHA1</i>  | -0,0181   | 0,0397    |
| <i>JAK2</i>     | -0,0179   | 0,0395    |
| <i>OLR1</i>     | -0,0178   | 0,0392    |
| <i>IL16</i>     | -0,0169   | 0,0372    |
| <i>SPN</i>      | 0,0168    | -0,037    |
| <i>CYLD</i>     | -0,0155   | 0,0341    |
| <i>PSTPIP1</i>  | -0,0144   | 0,0316    |
| <i>MEF2C</i>    | -0,0139   | 0,0305    |
| <i>APP</i>      | -0,0129   | 0,0283    |
| <i>SWAP70</i>   | -0,0125   | 0,0276    |
| <i>ECSIT</i>    | 0,0124    | -0,0273   |
| <i>CD37</i>     | -0,0123   | 0,0271    |
| <i>LIG4</i>     | -0,0116   | 0,0256    |
| <i>COLEC12</i>  | -0,0114   | 0,0251    |
| <i>SEMA4D</i>   | -0,0099   | 0,0218    |
| <i>SOCS3</i>    | -0,0077   | 0,017     |
| <i>MAP3K7</i>   | -0,0076   | 0,0167    |
| <i>ICAM2</i>    | -0,0061   | 0,0134    |
| <i>FAS</i>      | -0,0054   | 0,0118    |
| <i>IKBKB</i>    | -0,0036   | 0,0079    |
| <i>CD55</i>     | -0,0019   | 0,0041    |
| <i>TGFBI</i>    | -4e-04    | 0,001     |
| <i>PIK3CB</i>   | -3e-04    | 8e-04     |

**Supplementary Table S3: Primer sequences for qPCR**

| Gene name      | Forward primer                 | Reverse primer              |
|----------------|--------------------------------|-----------------------------|
| <i>TLR1</i>    | 5'TTTTGTGGCCAGGGTCTTCAT 3'     | 5' TCCTTTTTGTAGGGGTGCCCA 3' |
| <i>TLR4</i>    | 5'CCAAGAACCTGGACTGAGC 3'       | 5' TGTCTGGATTTACACCTGGAT 3' |
| <i>TLR7</i>    | 5' TCAAGAAAGTTGATGCTATTGGGC 3' | 5' ACCATCTAGCCCCAAGGAGT 3'  |
| <i>IRF7</i>    | 5'GCGGTGCAAGAGCCCAGCCC3'       | 5'CGTGCAGCTCGGGTGTCCCA3'    |
| <i>NOS2</i>    | 5'GCAGGACTCACAGCCTTTGGACC3'    | 5'GGCACGGCTGGATGTCGGACT3'   |
| <i>ARG1</i>    | 5'TCTCAAAGGGACAGCCACGAGGA 3'   | 5'TCAGCAAAGGGCAGGTCCCCATA3' |
| <i>MT1-MMP</i> | 5'CTCGGCCCAAAGCAGCAGCT 3'      | 5'GCGATGGCCGCTGAGAGTGA 3'   |
